# Supplementary material for: Liquor ammonia mediated V(v) insertion in thin Co3O4 sheets for improved pseudocapacitors with high energy density and high specific capacitance value
Source: Royal Society of Chemistry journal article supplement (doi:10.1039/c5cc06005b), 2015-01-01
Supplement: c5cc06005b1.pdf [file c5cc06005b1.pdf]

# Supporting Information

## **Liquor ammonia mediated V(V) insertion in thin $\text{Co}_3\text{O}_4$ sheet for improved pseudocapacitor with high energy density and high specific capacitance value**

Ramkrishna Sahoo<sup>1</sup>, Anindita Roy<sup>1</sup>, Soumen Dutta<sup>1</sup>, Chaiti Ray<sup>1</sup>, Teresa Aditya<sup>1</sup>, Anjali Pal<sup>2</sup>  
and Tarasankar Pal\*<sup>1</sup>

<sup>1</sup>Department of Chemistry Indian institute of Technology, Kharagpur, India, <sup>2</sup>Department of Civil Engineering Indian institute of Technology, Kharagpur, India

Email: tpal@chem.iitkgp.ernet.in

## **S 1. Experimental methods:**

**Synthesis of  $\text{Co}_3\text{O}_4$  nanosheets ( $\text{C}_1$ ):** Large scale  $\text{Co}_3\text{O}_4$  ultrathin nanosheet was prepared from co-precipitation method. First, 10 mL 0.05 M  $\text{CoSO}_4 \cdot 7\text{H}_2\text{O}$  aqueous solution was taken in 15 mL screw capped test tube. Then, 300  $\mu\text{L}$  liquor ammonia solution was injected to the previous solution and shaken to make the mixture homogeneous. There after the system was tightly capped and kept in modified hydrothermal reaction condition at 180 °C. After 24 h the grey product was centrifuged and washed with distilled water and ethanol to remove all the inorganic impurities. Finally the product was dried in vacuum and stored.

**Synthesis of  $\text{Co}_3\text{V}_2\text{O}_8$  nanosheets ( $\text{C}_2$ ):** Large scale  $\text{Co}_3\text{V}_2\text{O}_8$  ultrathin nanosheet was also prepared from a co-precipitation method. First, a mixture of 5 mL 0.05 M  $\text{CoSO}_4 \cdot 7\text{H}_2\text{O}$  and 5 mL 0.05 M  $\text{VOSO}_4$  aqueous solution was prepared. Then the mixture was taken in a 15 mL screw capped test tube. An aliquot of 300  $\mu\text{L}$  liquor ammonia solution was injected into the previous solution and shaken to make the reaction mixture homogeneous. After that the reaction mixture in the test tube was capped and subjected to modified hydrothermal reaction condition at 180 °C. After 24 h the grey product was centrifuged and washed with distilled water and ethanol to remove all the inorganic impurities. Finally the product was dried in vacuum and stored.

Powder X-ray diffraction (XRD) was performed with a BRUKER-AXS-D8-ADVANCE diffractometer (Cu target). The XRD data analysis was carried out using JCPDS software. X-ray photoelectron spectroscopy (XPS) analysis was executed with VG Scientific ESCALAB MK II spectrometer equipped with a Mg  $\text{K}\alpha$  excitation source (1253.6 eV) and a five-channeltron detection system to analyse the oxidation state of the elements. Field emission scanning electron microscopy (FESEM) analysis was performed with a Supra 40 (Carl Zeiss Pvt. Ltd) instrument and EDAX machine (Oxford link and ISIS 300) attached to the instrument was used to carry out the compositional analysis of the nanocrystal. Transmission electron microscopic (TEM) analysis was done in a Hitachi H-9000 NAR instrument using an accelerating voltage of 300 kV. Scanning transmission electron microscopy (STEM) analysis was carried out using AURIGA compact

instrument. Atomic force microscopy (AFM) was performed using Agilent Technologies, model No – 5550 AFM, tapping mode, cantilever frequency-160 KHz, cantilever length – 100  $\mu\text{M}$ , radius of curvature of tip – 10 nm, tip material – SiN.

### **Electrochemical measurements:**

The electrochemical performance has been tested using three electrode system measurements at room temperature. A stock KOH solution (3 M) was used as the electrolyte. Electrochemical studies of both the as-synthesized products were carried out by cyclic voltammetry (CV), chronopotentiometry (CP) or galvanostatic charge-discharge (GCD) and electrochemical impedance spectroscopy (EIS) technique. During the analysis glassy carbon electrode, Pt wire and saturated calomel electrode (SCE) were used as the working, counter and reference electrode, respectively. 7  $\mu\text{L}$  of 1 g/L aqueous dispersion of electrode material was drop casted on the glassy carbon electrode and 5  $\mu\text{L}$  of 0.05 wt% ethanolic nafion solution was used as the binder. It was left for 12 h. Before starting the experiments electrodes are dipped in 3M KOH electrolyte for 15 min. All the electrochemical measurements were carried out using CHI 660E electrochemical workstation.

### **S.2. EIS analysis of the $\text{Co}_3\text{V}_2\text{O}_8$ and $\text{Co}_3\text{O}_4$ pseudocapacitor:**

Figure S13a,b displays the Nyquist plot for  $\text{C}_1$  and  $\text{C}_2$  samples before and after the 10000 charge-discharge cycles and Figure S13c contains the corresponding equivalent circuit. EIS measurements have been done within the frequency range from 0.1 Hz to  $10^5$  Hz at AC voltage amplitude of 5 mV. Table S4 illustrates the calculated parameters obtained by fitting the Nyquist plot with the Randles equivalent circuit.  $R_s$  stands for the internal resistance which includes the internal resistance of the electrode, ionic resistance of the electrolyte and interfacial resistance between the electrode surface and electrode material. From Table S4 it is observed that after 10000 cycles,  $R_s$  value decreases for both  $\text{C}_1$  and  $\text{C}_2$ . This may be due to interfacial detachment of the glassy carbon electrode and the material.  $R_{\text{CF}}$  stands for the charge-transfer resistance. In our case increase in  $R_{\text{CF}}$  for  $\text{C}_1$  is much more than the  $\text{C}_2$  after 10000 cycles. In case of  $\text{C}_2$ , the ultrathin structure remains almost intact but  $\text{C}_1$  structure ruptures during charge-discharge process, at high current density. Thus, after 10000 cycles charge transportation remains almost the same for  $\text{C}_2$ . In the Nyquist plot (Figure S13), the quasi

vertical lines, leaning to the imaginary axis ( $Z''$ ) in the low frequency region, stand for the Warburg constant which designates the diffusive resistance. Table S4 illustrates the diffusive resistance of the  $C_1$  and  $C_2$  samples before and after the 10000 cycles. According to that initially diffusive resistance for  $C_1$  is higher than  $C_2$  and after 10000 charge-discharge cycles rate of increase of diffusive resistance for  $C_1$  is greater than  $C_2$ .

### S 3. Calculation details of the electrochemical analysis:

$$\text{Specific capacitance, } C_{sp} = \left( \int_{v1}^{v2} iVdv \right) / mv(V2 - V1) \text{ -----1}$$

Where, the numerator stands for the total charge, m for electrode mass, v for the scan rate, and (V2 - V1) is for the potential window.

$$\text{Specific capacitance, } C = it/m\Delta V \text{ ----- 2}$$

Where, i signifies the constant cathodic current, t signifies the discharge time, m the weight of the active mass and  $\Delta V$  is the potential window.

$$\eta = t_D/t_C \times 100 \text{ ----- 3}$$

$t_D$  is the discharging time and  $t_C$  is the charging time.

$$\text{Energy density, } E = \frac{1}{2}C\Delta V^2 \text{ ----- 4}$$

$$\text{Power density, } P = E/T \text{ ----- 5}$$

Where, C denotes the specific capacitance at current density,  $\Delta V$  is the potential window, and T is the discharge time.

### S.4. Asymmetric Supercapacitor:

To design asymmetric supercapacitor here we have used  $\text{Co}_3\text{O}_4$  ( $C_1$ ) and  $\text{Co}_3\text{V}_2\text{O}_8$  ( $C_2$ ) as the positive electrode and activated carbon (AC) as the negative electrode. To fabricate positive electrode we have dispersed  $\text{Co}_3\text{O}_4$  or  $\text{Co}_3\text{V}_2\text{O}_8$ , acetylene black and polyvinylidene fluoride (PVDF) in NMP solvent in the weight ratio of 85:10:5. For the negative electrode we have dispersed AC, acetylene black and

PVDF in NMP solvent in the weight percentage of 85:10:5. Then the slurry was pasted on  $1 \times 1 \text{ cm}^2$  Ni foam by the use of a spatula. Then the electrodes were dried at  $120 \text{ }^\circ\text{C}$  for 12 h. Full cell measurement was performed using  $\text{Co}_3\text{V}_2\text{O}_8$  or  $\text{Co}_3\text{O}_4$  as the cathode and AC as the anode, separated by a distance of 2 cm. Pt wire was used to connect the electrodes and the instrument. 3M KOH was used as the electrolyte. We have performed the asymmetric cell study in the voltage window of 1.6 V. To achieve the maximum specific capacitance value of the asymmetric cell, the storage capacity of negative and positive electrodes has to be balanced by the following equation,

$$1/C_{\text{total}} = 1/C_{\text{cathode}} + 1/C_{\text{anode}} \text{ -----6}$$

Charge storage capacity of the asymmetric cell has been balanced by adjusting the mass ratio of  $\text{Co}_3\text{V}_2\text{O}_8$  or  $\text{Co}_3\text{O}_4$  and AC. Mass ratio was calculated by achieving the charge balance using the following equation,

$$m_+/m_- = (C_- \times \Delta E_-)/(C_+ \times \Delta E_+) \text{ -----7}$$

where  $q_+$ ,  $q_-$ ,  $m_+$ ,  $m_-$ ,  $C_+$ ,  $C_-$ ,  $E_+$ , and  $E_-$  are the charge, mass, specific capacitance and potential windows obtained in the three-electrode measurement for the positive and negative electrode. For both asymmetric cell weight of the active material was 3 mg (for  $\text{Co}_3\text{O}_4//\text{AC}$ ,  $\text{Co}_3\text{O}_4 : \text{AC}$  was 1 : 2 and for  $\text{Co}_3\text{V}_2\text{O}_8//\text{AC}$ ,  $\text{Co}_3\text{V}_2\text{O}_8 : \text{AC}$  was 1 : 7).

Figure S14 demonstrates the CV curve of  $\text{Co}_3\text{V}_2\text{O}_8//\text{AC}$  and  $\text{Co}_3\text{O}_4//\text{AC}$  at different scan rate. From the non rectangular CV curve in both the figure it can be concluded that capacitance in the asymmetric supercapacitor is dominated by the pseudocapacitance of the oxide materials compared to the double layer capacitance of the AC. Figure S15 illustrates the charge-discharge curve of the two asymmetric cell at different current densities. The highest specific capacitance of  $\text{Co}_3\text{V}_2\text{O}_8//\text{AC}$  and  $\text{Co}_3\text{O}_4//\text{AC}$  are 303 F/g and 121 F/g, respectively at 1 A/g current density. We also have checked the stability of the asymmetric supercapacitors up to 10000 cycles (Figure S16). According to the result,

$\text{Co}_3\text{V}_2\text{O}_8//\text{AC}$  can retain 97% of its specific capacitance even after 10000 cycles where as for  $\text{Co}_3\text{O}_4//\text{AC}$  specific capacitance decreases to 74% after the same.

To characterize the superior electrochemical activity of the  $\text{Co}_3\text{V}_2\text{O}_8//\text{AC}$  over  $\text{Co}_3\text{O}_4//\text{AC}$ , we have performed the EIS measurement for both the cell. EIS measurements have been done within the frequency range from 0.1 Hz to  $10^5$  Hz at AC voltage amplitude of 5 mV. Figure S17a and b illustrate the Nyquist plot for  $\text{Co}_3\text{V}_2\text{O}_8//\text{AC}$  and  $\text{Co}_3\text{O}_4//\text{AC}$ , respectively. Figure S17a demonstrates that change in charge transfer resistance for  $\text{Co}_3\text{O}_4//\text{AC}$  asymmetric cell is very high, which may be due to the rupture of morphology of  $\text{Co}_3\text{O}_4$  during the cycles at high current density. This is the reason behind the drastic change in the specific capacitance for  $\text{Co}_3\text{O}_4//\text{AC}$  after 10000 cycles. On the other hand, from Figure S17b, it can be observed that for  $\text{Co}_3\text{V}_2\text{O}_8//\text{AC}$  before and after 10000 cycles nature of the plot is almost same i.e, no such abrupt change in the internal resistance or charge transfer resistance has occurred. Thus  $\text{Co}_3\text{V}_2\text{O}_8//\text{AC}$  is considerably more stable after 10000 cycles. Figure S18 demonstrates the Ragone plot for the two asymmetric cells. The highest energy density for  $\text{Co}_3\text{V}_2\text{O}_8//\text{AC}$  and  $\text{Co}_3\text{O}_4//\text{AC}$  are  $107 \text{ Wh kg}^{-1}$  at power density  $800 \text{ W kg}^{-1}$  and  $43.09 \text{ Wh kg}^{-1}$  at power density  $789.81 \text{ W kg}^{-1}$ , respectively.

**Tables:**

| Electrode Material                                      | Specific capacitance            | Type of electrode (current collector)                                           | References |
|---------------------------------------------------------|---------------------------------|---------------------------------------------------------------------------------|------------|
| 1. Co <sub>3</sub> O <sub>4</sub> @Pt@MnO <sub>2</sub>  | 539 F/g at 1A/g                 | Three electrode cell ( Ti foil)                                                 | S1         |
| 2. Co <sub>3</sub> O <sub>4</sub> nanosheet             | 1782 F/g at 1.8 A/g             | Three electrode cell (Ni foam)                                                  | S2         |
| 3. Co <sub>3</sub> O <sub>4</sub>                       | 548 F/g at 8 A/g                | Three electrode cell (Ni foil)                                                  | S3         |
| 4. Co <sub>3</sub> O <sub>4</sub> /rGO                  | 402 F/g at 2 A/g                | Three electrode cell (Ni foam)                                                  | S4         |
| 5. Co <sub>3</sub> O <sub>4</sub> /graphene             | 157.5 F/g at 0.1 A/g            | Three electrode cell (Ni foam)                                                  | S5         |
| 6. Co(OH) <sub>2</sub> (alpha)                          | 952 F/g at 5 mA/cm <sup>2</sup> | Three electrode cell (Ni foam)                                                  | S6         |
| 7. Co <sub>3</sub> O <sub>4</sub> @RuO <sub>2</sub>     | 905 F/g at 1 A/g                | Three electrode cell (carbon paper)                                             | S7         |
| 8. CoMoO <sub>4</sub> /graphene                         | 2741 F/g at 1.43 A/g            | Three electrode cell (Ni foam)                                                  | S8         |
| 9. Co(OH) <sub>2</sub> (beta)                           | 2028 F/g at 1A/g                | Three electrode cell (graphite)                                                 | S9         |
| 10. Ni(OH) <sub>2</sub>                                 | 1677 F/g at 5 mV/S              | Three electrode cell (graphite sheet)                                           | S10        |
|                                                         | 153 F/g at 5 mV/S               | Two electrode cell/asymmetric supercapacitor                                    |            |
| 11. Ni(OH) <sub>2</sub>                                 | 4172.5 F/g at 1A/g              | Three electrode cell (Ni foam)                                                  | S11        |
| 12. Cl dopped carbonated Co(OH) <sub>2</sub>            | 9893.75 F/g at 0.5 A/g          | Three electrode cell (Ni foam)                                                  | S12        |
| 13. NiCo <sub>2</sub> O <sub>4</sub>                    | 1450 F/g at 20A/g               | Three electrode cell (Ni foam)                                                  | S13        |
| 14. Co <sub>3</sub> V <sub>2</sub> O <sub>8</sub>       | 739 F/g at 0.5A/g               | Three electrode cell (Ni foam)                                                  | S14        |
| 15. Co <sub>3</sub> O <sub>4</sub> nanosheet            | 1256 F/g at 1A/g                | Three electrode cell (no additional current collector), glassy carbon electrode | This work  |
| Co <sub>3</sub> V <sub>2</sub> O <sub>8</sub> nanosheet | 4194 F/g at 1 A/g               |                                                                                 |            |

**Table S1:** Specific capacitance of different reported electrode materials.

| <b>Current density<br/>(A/g)</b> | <b>Specific capacitance (C<sub>1</sub>)<br/>(F/g)</b> | <b>Specific capacitance (C<sub>2</sub>)<br/>(F/g)</b> |
|----------------------------------|-------------------------------------------------------|-------------------------------------------------------|
| 1                                | 1256                                                  | 4194                                                  |
| 2                                | 1078                                                  | 3877                                                  |
| 3                                | 1004                                                  | 3566                                                  |
| 4                                | 946                                                   | 3137                                                  |
| 5                                | 889                                                   | 2911                                                  |
| 6                                | 837                                                   | 2697                                                  |
| 7                                | 804                                                   | 2537                                                  |
| 8                                | 788                                                   | 2379                                                  |
| 9                                | 743                                                   | 2191                                                  |
| 10                               | 7193                                                  | 2080                                                  |
| 11                               | 705                                                   | 1977                                                  |
| 12                               | 679                                                   | 1820                                                  |
| 13                               | 659                                                   | 1771                                                  |
| 15                               | 624                                                   | 1733                                                  |
| 20                               | 566                                                   | 1627                                                  |
| 25                               | 533                                                   | 1515                                                  |
| 30                               | 461                                                   | 1400                                                  |

**Table S2:** Specific capacitance of C<sub>1</sub> and C<sub>2</sub> samples at different current densities.



| Supercapacitor                                | Energy density value (Wh kg <sup>-1</sup> ) | Reference |
|-----------------------------------------------|---------------------------------------------|-----------|
| <b>Symmetric supercapacitor</b>               |                                             |           |
| Ni(OH) <sub>2</sub> /carbon nanotube          | 50.6                                        | S15       |
| Ni(OH) <sub>2</sub>                           | 35.7                                        | S10       |
| β-Co(OH) <sub>2</sub>                         | 108.9                                       | S9        |
| CoMoO <sub>4</sub>                            | 37.25                                       | S8        |
| CuCo <sub>2</sub> O <sub>4</sub>              | 3.05                                        | S16       |
| NiCo <sub>2</sub> O <sub>4</sub>              | 22.6                                        | S17       |
| Co <sub>3</sub> O <sub>4</sub>                | 62.8                                        | This work |
| Co <sub>3</sub> V <sub>2</sub> O <sub>8</sub> | 209                                         |           |

**Table S3:** Energy density of different reported supercapacitor.

|                         |                              | <b>Internal<br/>resistance,<br/><math>R_S</math> (ohm)</b> | <b>Charge transfer<br/>resistance,<br/><math>R_{CT}</math> (ohm)</b> | <b>Diffusive<br/>resistance, <math>W</math><br/>(ohm)</b> |
|-------------------------|------------------------------|------------------------------------------------------------|----------------------------------------------------------------------|-----------------------------------------------------------|
| <b><math>C_1</math></b> | <b>Initial</b>               | 7.769                                                      | 30.5                                                                 | 0.0027                                                    |
|                         | <b>After<br/>10000 Cycle</b> | 8.113                                                      | 45.7                                                                 | 0.0098                                                    |
| <b><math>C_2</math></b> | <b>Initial</b>               | 6.78                                                       | 17.48                                                                | 0.0017                                                    |
|                         | <b>After<br/>10000 cycle</b> | 7.341                                                      | 20.16                                                                | 0.0033                                                    |

**Table S4:** Parameters obtained from Nyquist plot for  $C_1$  and  $C_2$  samples before and after 10000 cycles.

## References:

- S1. . H. Xia, D. Zhu, Z. Luo, Y. Yu, X. Xhi, G. Yuan and J. Xie, *Sci. Rep.*, 2013, **3**, 2978(1-8).
- S2. Q. Yang, Z. Liu, X. Sun and J. Liu, *Sci. Rep.*, 2013, **3**, 3537.
- S3. . S. K. Meher and G. R. Rao, *J. Phys. Chem. C*, 2011, **115**, 15646.
- S4. Z. Song, Y. Zhang, W. Liu, S. Zhang, G. Liu, H. Chen and J. Qui, *Electrochim Acta*, 2013, **112**, 120.
- S5. Q. Guan, J. Cheng, B. Wang, W. Ni, G. Gu, X. Li, L. Huang, G. Yang and F. Nie, *ACS Appl. Mater. Interfaces*, 2014, **6**, 7626.
- S6. Z. Gao, W. Yang, Y. Yan, J. Wang, J. Ma, X. Zhang, B. Xing and L. Liu, *Eur. J. Inorg. Chem.*, 2013, **27**, 4832.
- S7. R. B. Rakhi, W. Chen, M. N. Hedhili, D. Cha and H. N. Alshareef, *ACS Appl. Mater. Interfaces*, 2014, **6**, 4196.
- S8. X. Yu, B. Lu and Z. Xu, *Adv. Mater.*, 2014, **26**, 1044.
- S9. S. Gao, Y. Sun, F. Lei, L. Liang, J. Liu, W. Bei, B. Pan and Y. Xie, *Angew. Chem. Int. Ed.*, 2014, **53**, 12789.
- S10. H. B. Li, M. H. Yu, F. X. Wang, P. Liu, Y. Liang, J. Xiao, C. X. Wang, Y. X. Tong, G. W. Yang, *Nat. Commun.*, 2012, **4**, 1894.
- S11. Y. Zhu, C. Cao, S. Tao, W. Chu, Z. Wu and Y. Li, *Sci. Rep.*, 2014, **4**, 5487.
- S12. N. Mahmood, M. Tahir, A. mahmood, J. Zhu and C. Cao and Y. Hou, *Nano Energy*, 2015, **11**, 267.
- S13. C. Yuan, J. Li, L. Hou, , X. Zhang, L. Shen and X. W. Lou, *Adv. Funct. Mater.* 2012, **22**, 4592.
- S14. Y. Zhang, Y. Liu, J. Chen, Q. Guo, T. Wang and H. Pang, *Sci. Rep.*, 2014, **4**, 5687.

S15. Z. Tang, C. Tang, H. Gong, *Adv. Funct. Mater.*, 2012, **22**, 1272.

S16. A. Pendashteh, M. S. Rahmanifar, R. B. Kaner and M. F. Mousav, *Chem. Commun.*, 2014, **50**, 1972.

S17. H. Jiang, J. Ma and C. Li, *Chem. Commun.*, 2012, **48**, 4465.

Figures:

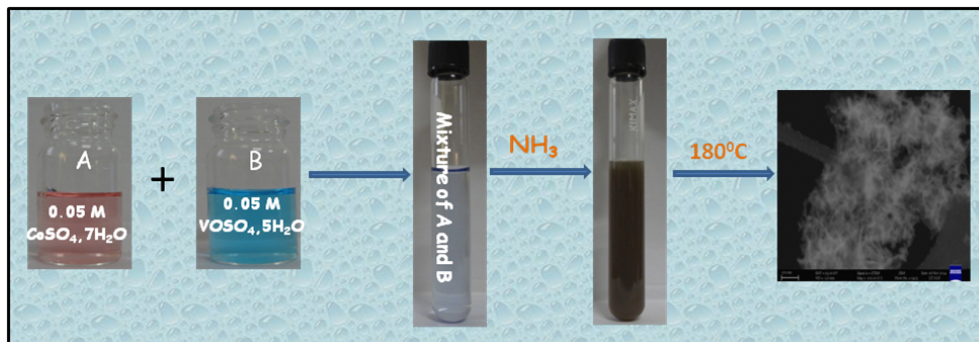

Figure S1: Schematic presentation of the synthesis of C<sub>2</sub> sample.

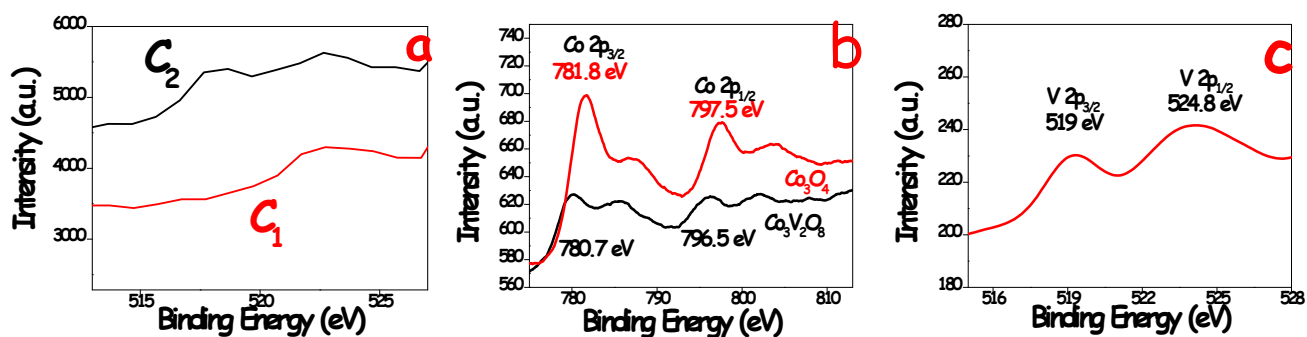

Figure S2: Narrow range XPS for a) C<sub>1</sub> and C<sub>2</sub> to indicate the presence of V in C<sub>2</sub>, b) Co 2p and c) V 2p atom in C<sub>1</sub> and C<sub>2</sub> samples.

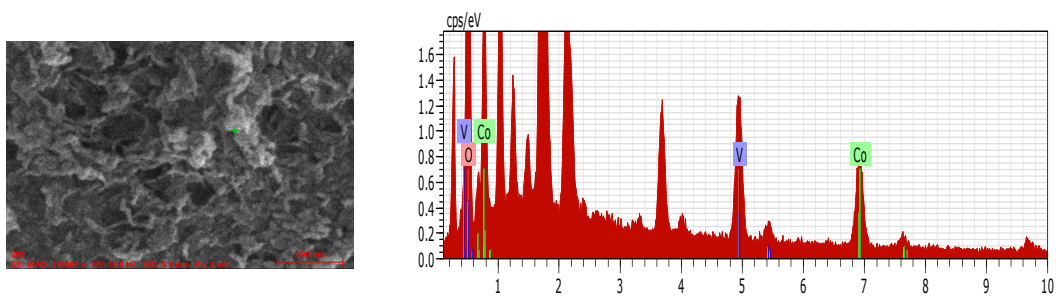

**Figure S3:** EDS profile of the C<sub>2</sub> sample.

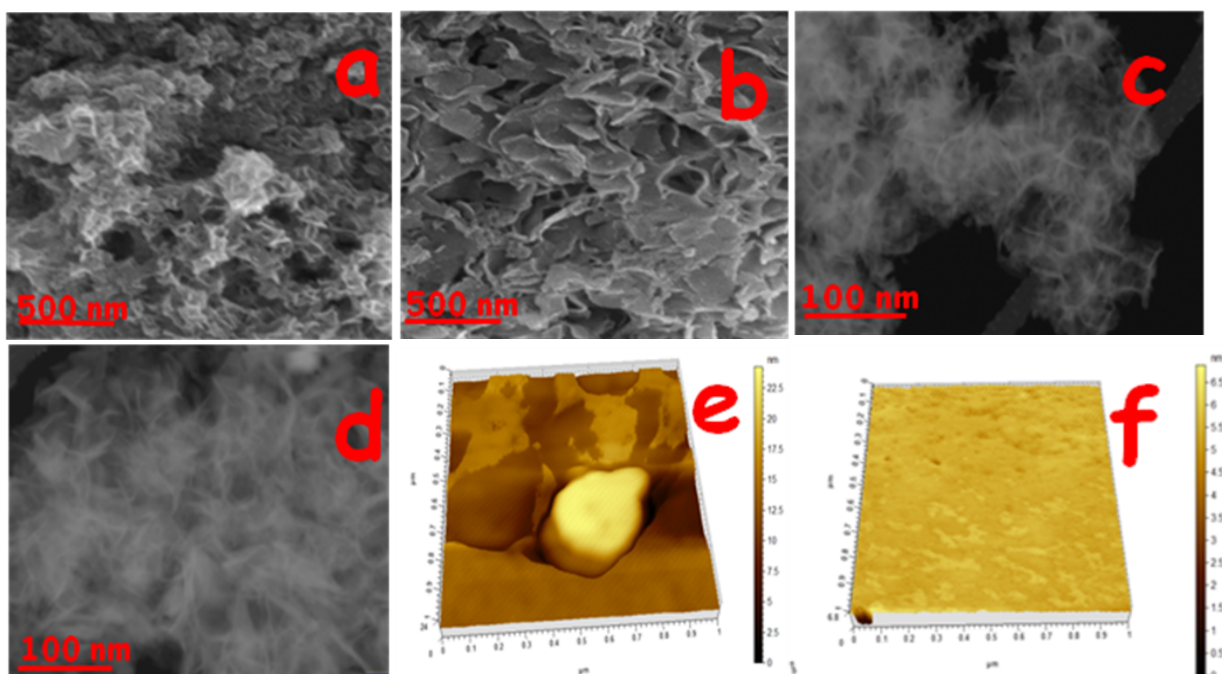

**Figure S4:** FESEM images of a) C<sub>2</sub> and b) C<sub>1</sub>, STEM images of c) C<sub>2</sub> and d) C<sub>1</sub>, AFM images of e) C<sub>2</sub> and f) C<sub>1</sub> samples.

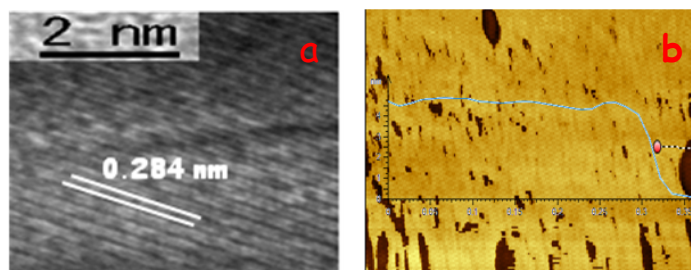

**Figure S5:** a) Fringe spacing and b) AFM thickness profile of  $C_1$  sample.

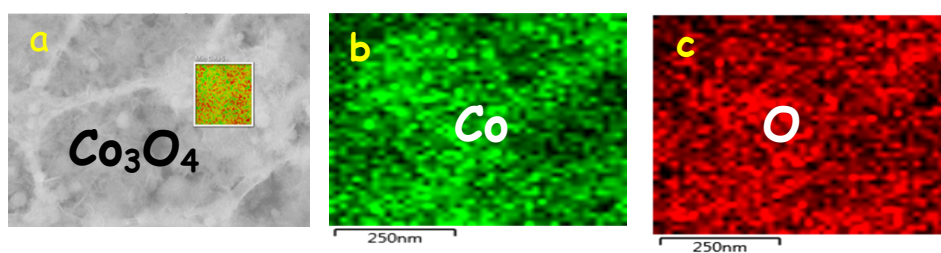

**Figure S6.** STEM image elemental area mapping of  $C_1$  sample.

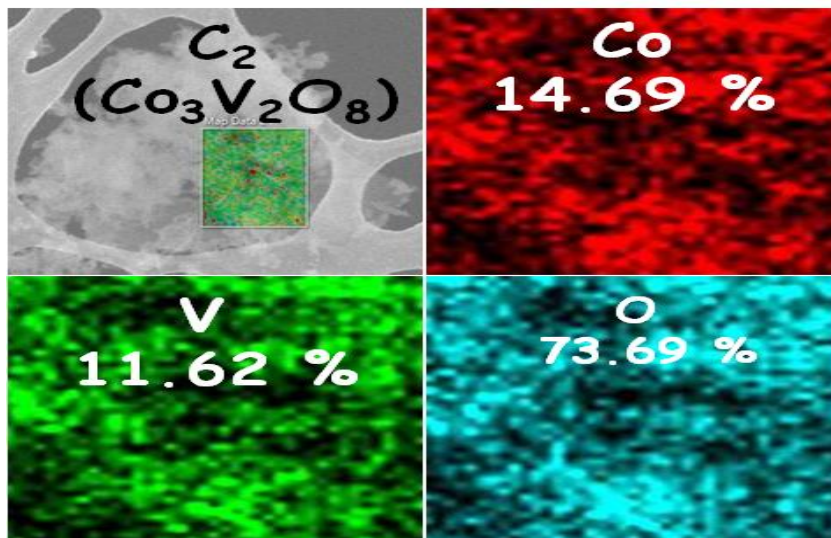

**Figure S7:** STEM image elemental area mapping of C<sub>2</sub> sample

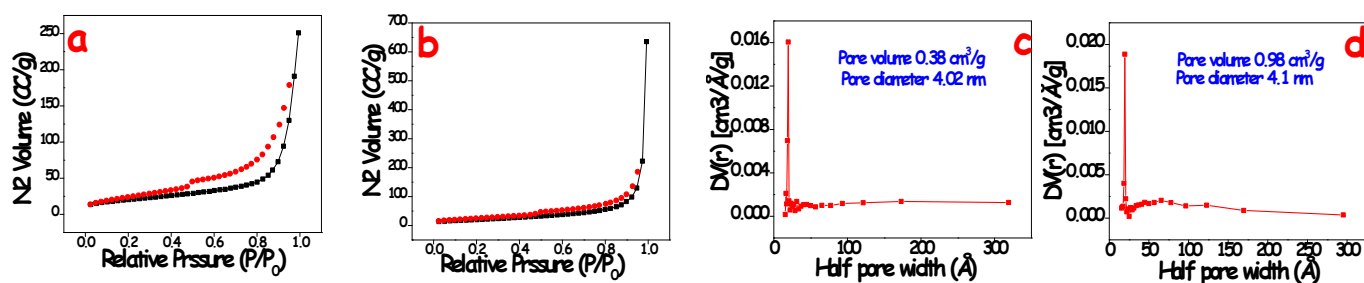

**Figure S8:** N<sub>2</sub> adsorption-desorption isotherm for (a) C<sub>1</sub> sample and (b) C<sub>2</sub> sample. Pore size distribution curve for (c) C<sub>1</sub> and (d) C<sub>2</sub> sample.



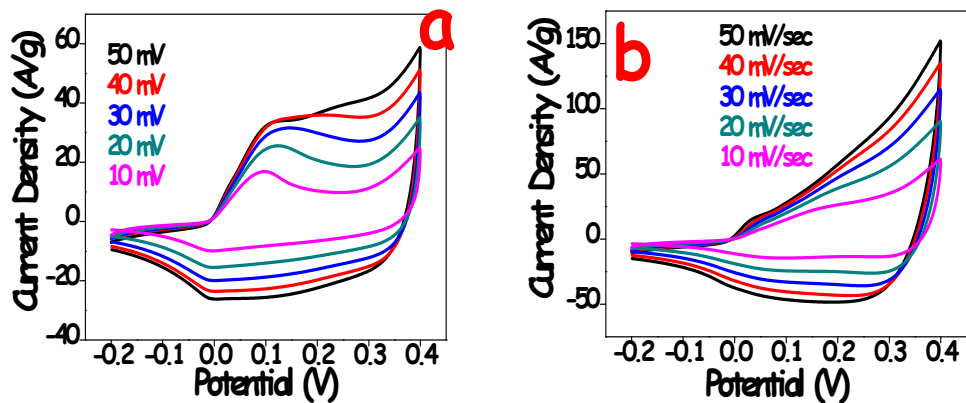

Figure S9: CV curves for a)  $C_1$  and b)  $C_2$  at different scan rates.

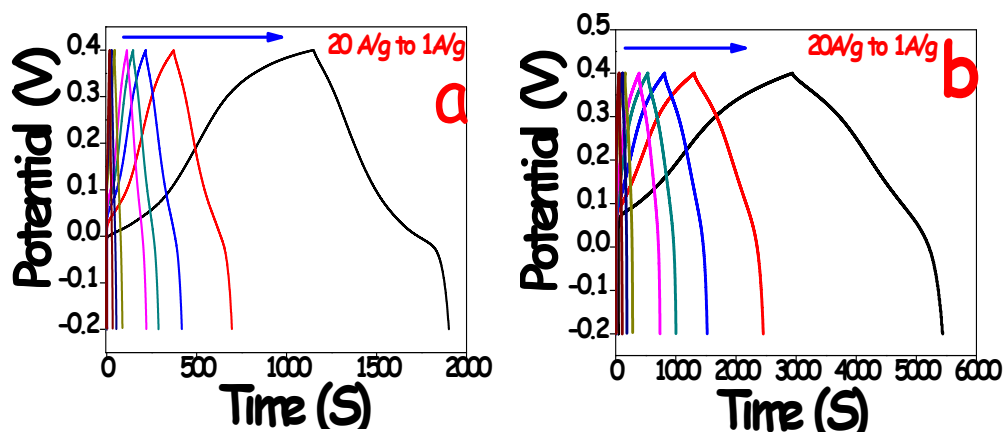

Figure S10: Charge-discharge curve of a)  $C_1$  and b)  $C_2$  at different current densities.

| ISO 25178                  |       |    |                         |
|----------------------------|-------|----|-------------------------|
| Height Parameters <b>a</b> |       |    |                         |
| Sq                         | 0.992 | nm | Root mean square height |
| Ssk                        | -2.81 |    | Skewness                |
| Sku                        | 11.8  |    | Kurtosis                |
| Sp                         | 2.25  | nm | Maximum peak height     |
| Sv                         | 5.62  | nm | Maximum pit height      |
| Sz                         | 7.87  | nm | Maximum height          |
| Sa                         | 0.559 | nm | Arithmetic mean height  |

| ISO 25178                  |       |    |                         |
|----------------------------|-------|----|-------------------------|
| Height Parameters <b>b</b> |       |    |                         |
| Sq                         | 3.80  | nm | Root mean square height |
| Ssk                        | 0.676 |    | Skewness                |
| Sku                        | 4.55  |    | Kurtosis                |
| Sp                         | 11.1  | nm | Maximum peak height     |
| Sv                         | 13.1  | nm | Maximum pit height      |
| Sz                         | 24.3  | nm | Maximum height          |
| Sa                         | 2.62  | nm | Arithmetic mean height  |

Figure S11: Roughness profile of a)  $C_1$  and b)  $C_2$  obtained from AFM image.

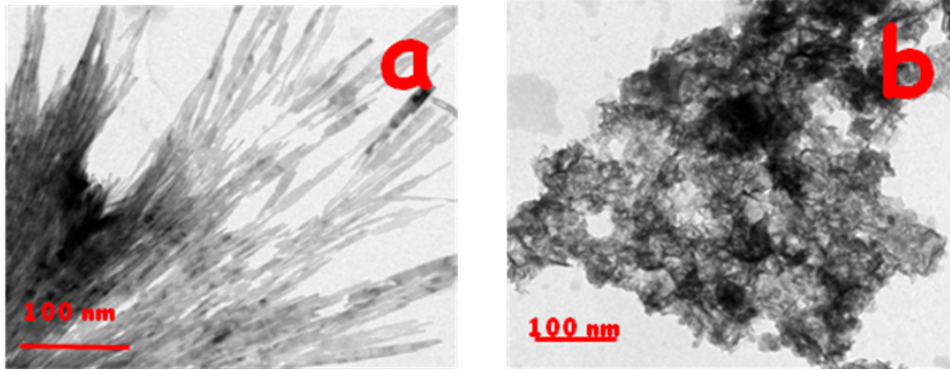

**Figure S12:** TEM images of a)  $C_1$  and b)  $C_2$  sample after 10000 charge-discharge cycle.

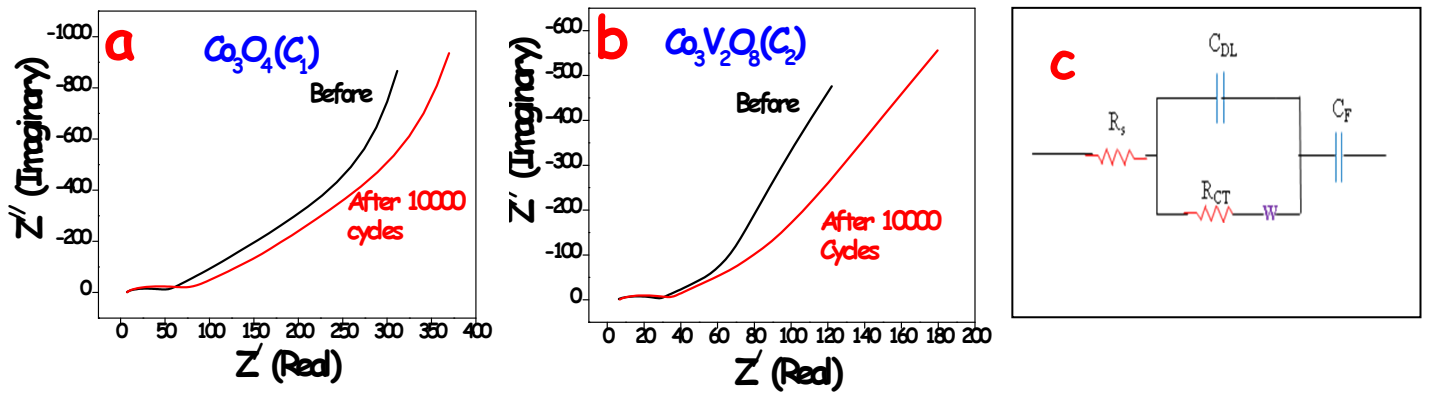

**Figure S13:** Nyquist plot for (a)  $C_1$  and (b)  $C_2$  samples before and after 10000 charge-discharge cycles, respectively. (c) The equivalent circuit of the supercapacitor, where  $C_{DL}$ ,  $C_F$ ,  $R_{CT}$ ,  $R_s$  and  $W$  stand for double layer capacitance, pseudocapacitance, charge transfer resistance, internal resistance and Warburg constant, respectively.

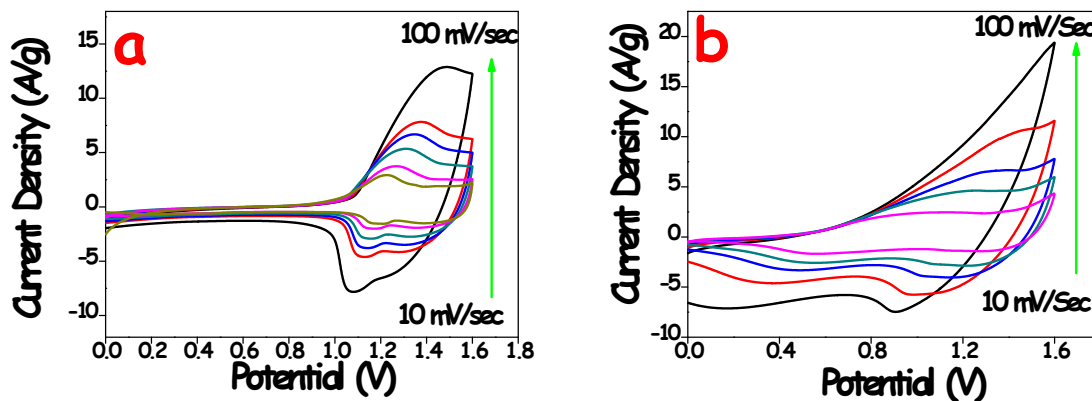

Figure S14: CV curve for (a)  $\text{Co}_3\text{O}_4//\text{AC}$  and (b)  $\text{Co}_3\text{V}_2\text{O}_8//\text{AC}$  at different scan rate.

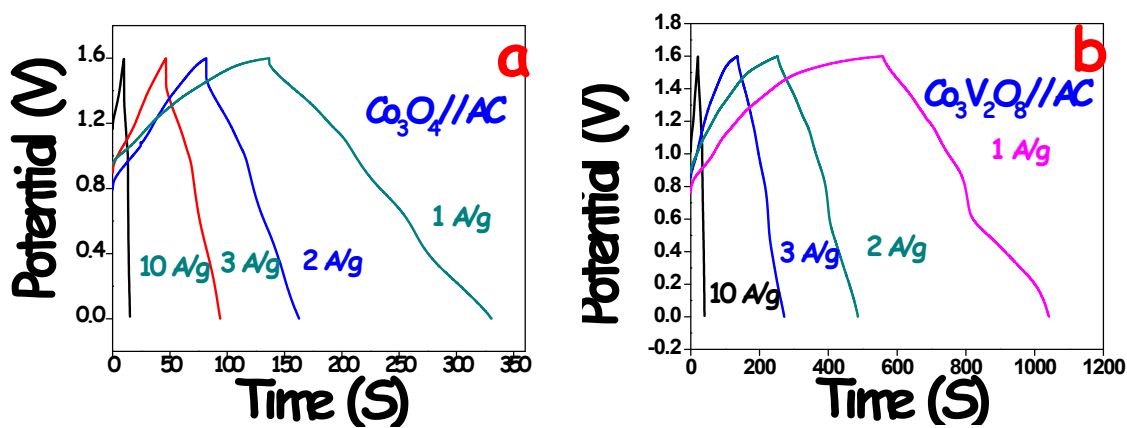

Figure S15: Charge-discharge curve for (a)  $\text{Co}_3\text{O}_4//\text{AC}$  and (b)  $\text{Co}_3\text{V}_2\text{O}_8//\text{AC}$  at different current densities.

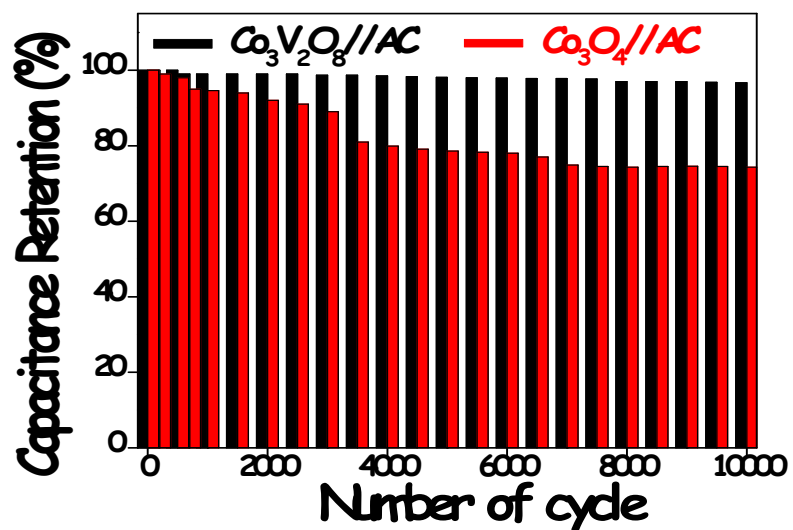

**Figure S16:** Comparative study of the percentage retention of specific capacitance for Co<sub>3</sub>O<sub>4</sub>//AC and Co<sub>3</sub>V<sub>2</sub>O<sub>8</sub>//AC up to 10000 cycles.

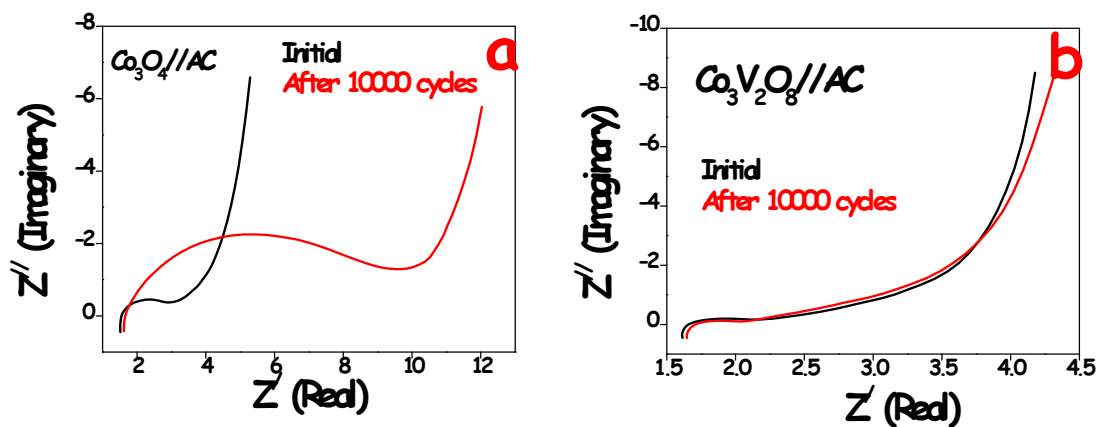

**Figure S17:** Nyquist plot for (a) Co<sub>3</sub>O<sub>4</sub>//AC and (b) Co<sub>3</sub>V<sub>2</sub>O<sub>8</sub>//AC before and after 10000 cycles.

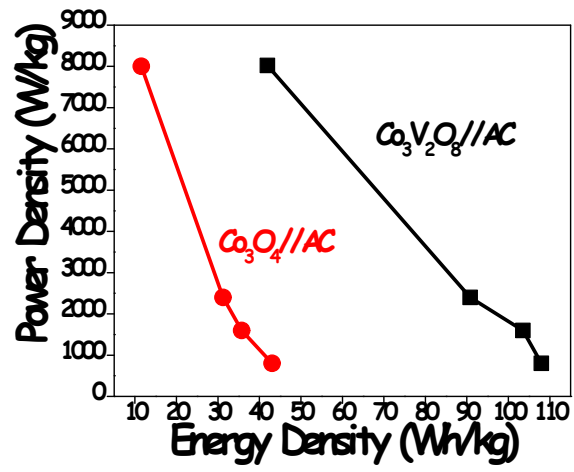

**Figure S18:** Ragone plot for  $\text{Co}_3\text{O}_4//\text{AC}$  and  $\text{Co}_3\text{V}_2\text{O}_8//\text{AC}$ .
